# Supplementary material for: Human cancer-associated fibroblasts enhance glutathione levels and antagonize drug-induced prostate cancer cell death
Source: PubMed Central journal article supplement (PMC5520886; doi:10.1038/cddis.2017.225), 2017-06-01
Supplement: cddis2017225x1.pdf [file cddis2017225x1.pdf]

# Supplementary Figures

Figure S1

A

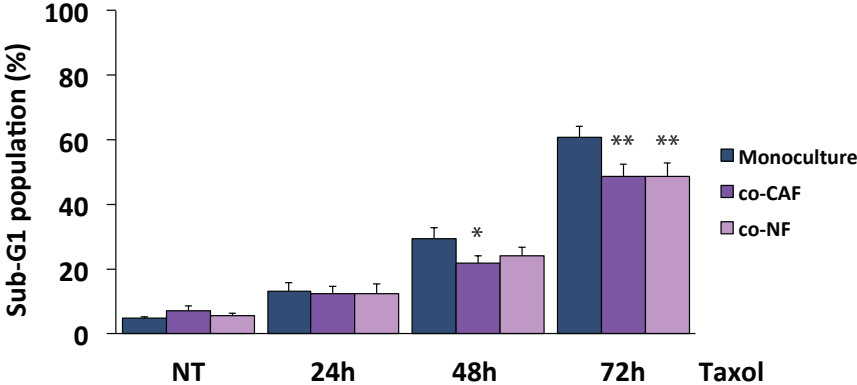

B

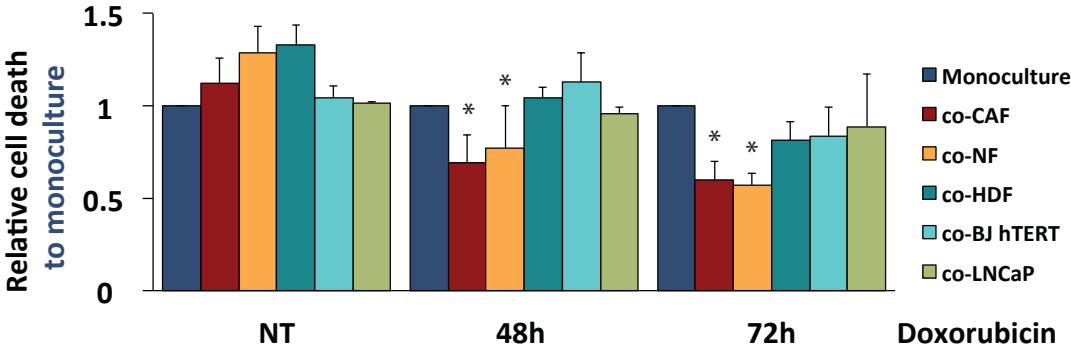

Figure S2

A

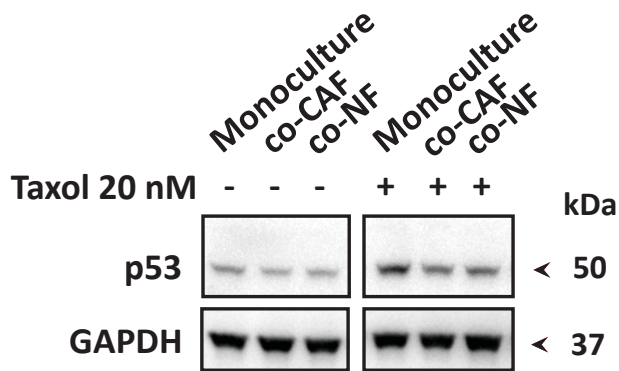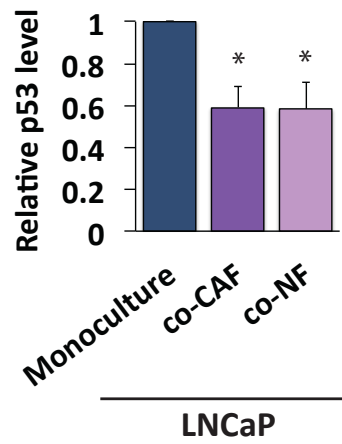

B

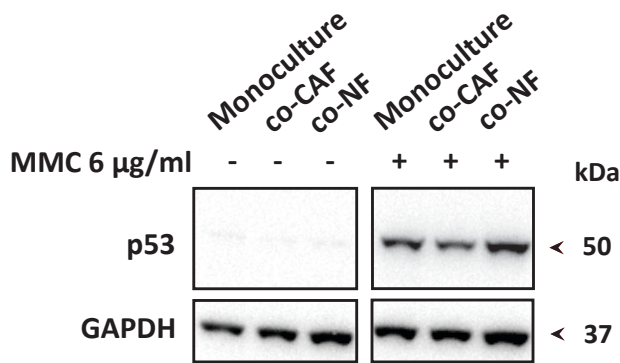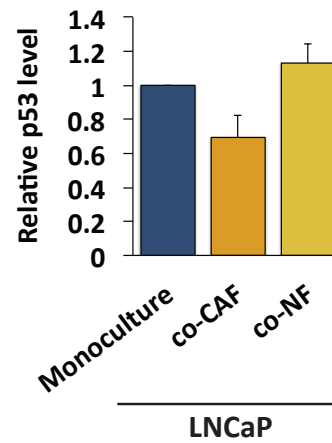

C

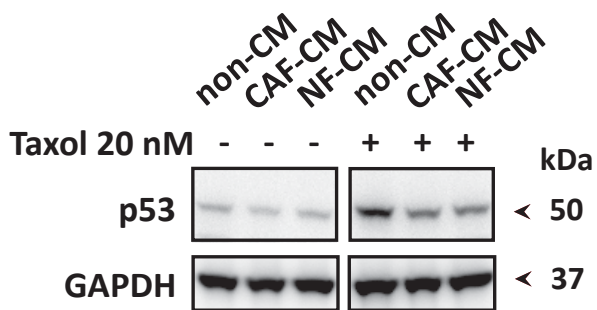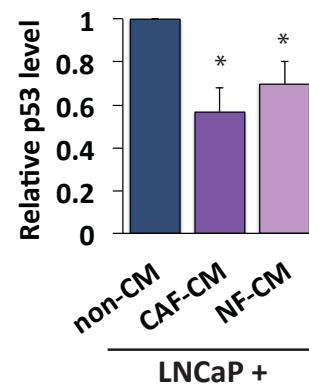

Figure S3

A

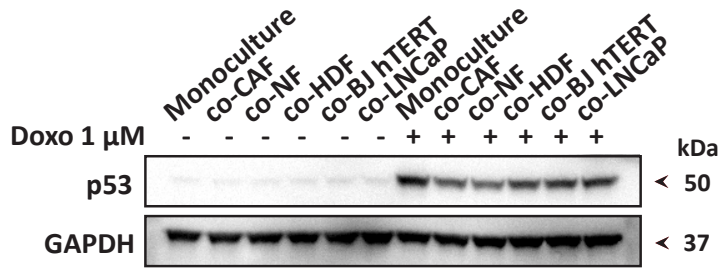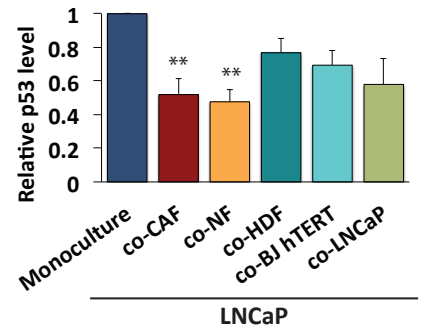

B

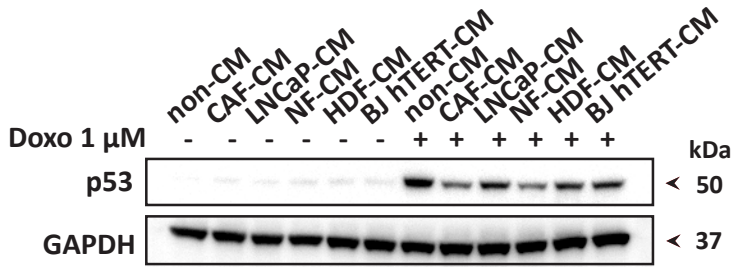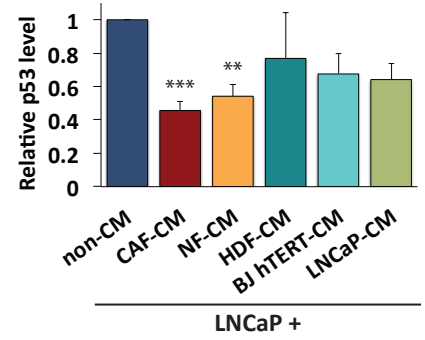

Figure S4

A

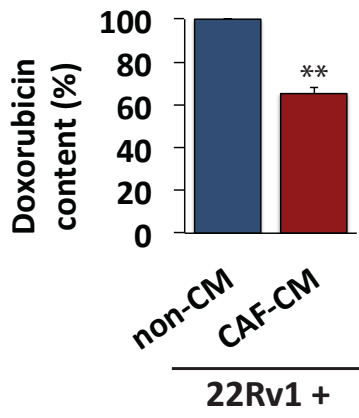

B

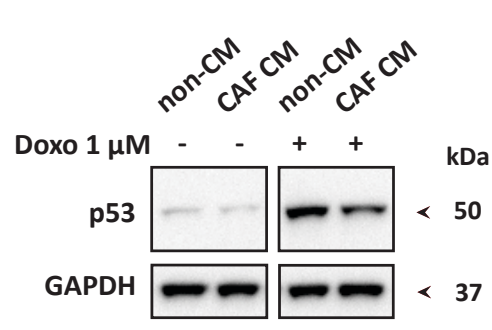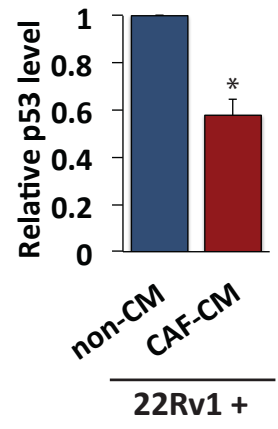



Figure S5

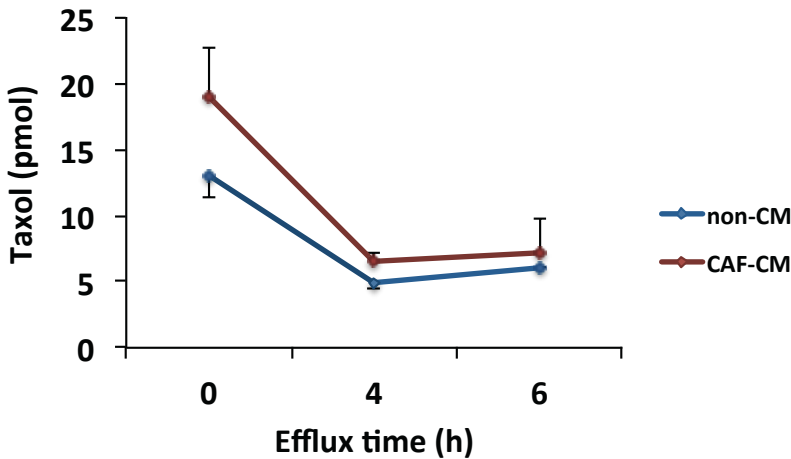

Figure S6

A

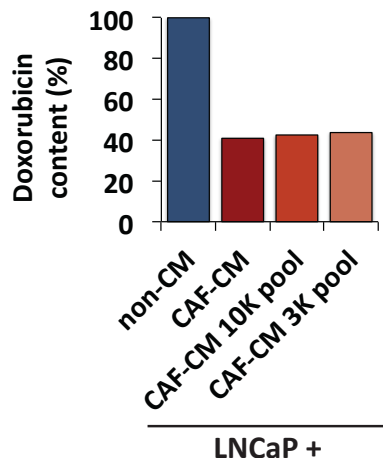

B

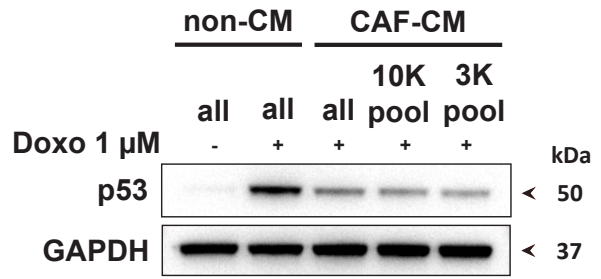

Figure S7

A

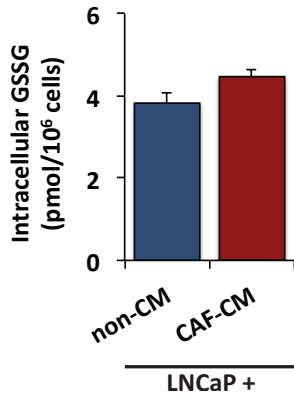

C

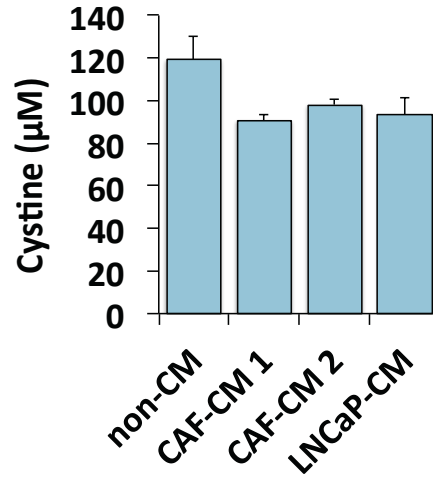

B

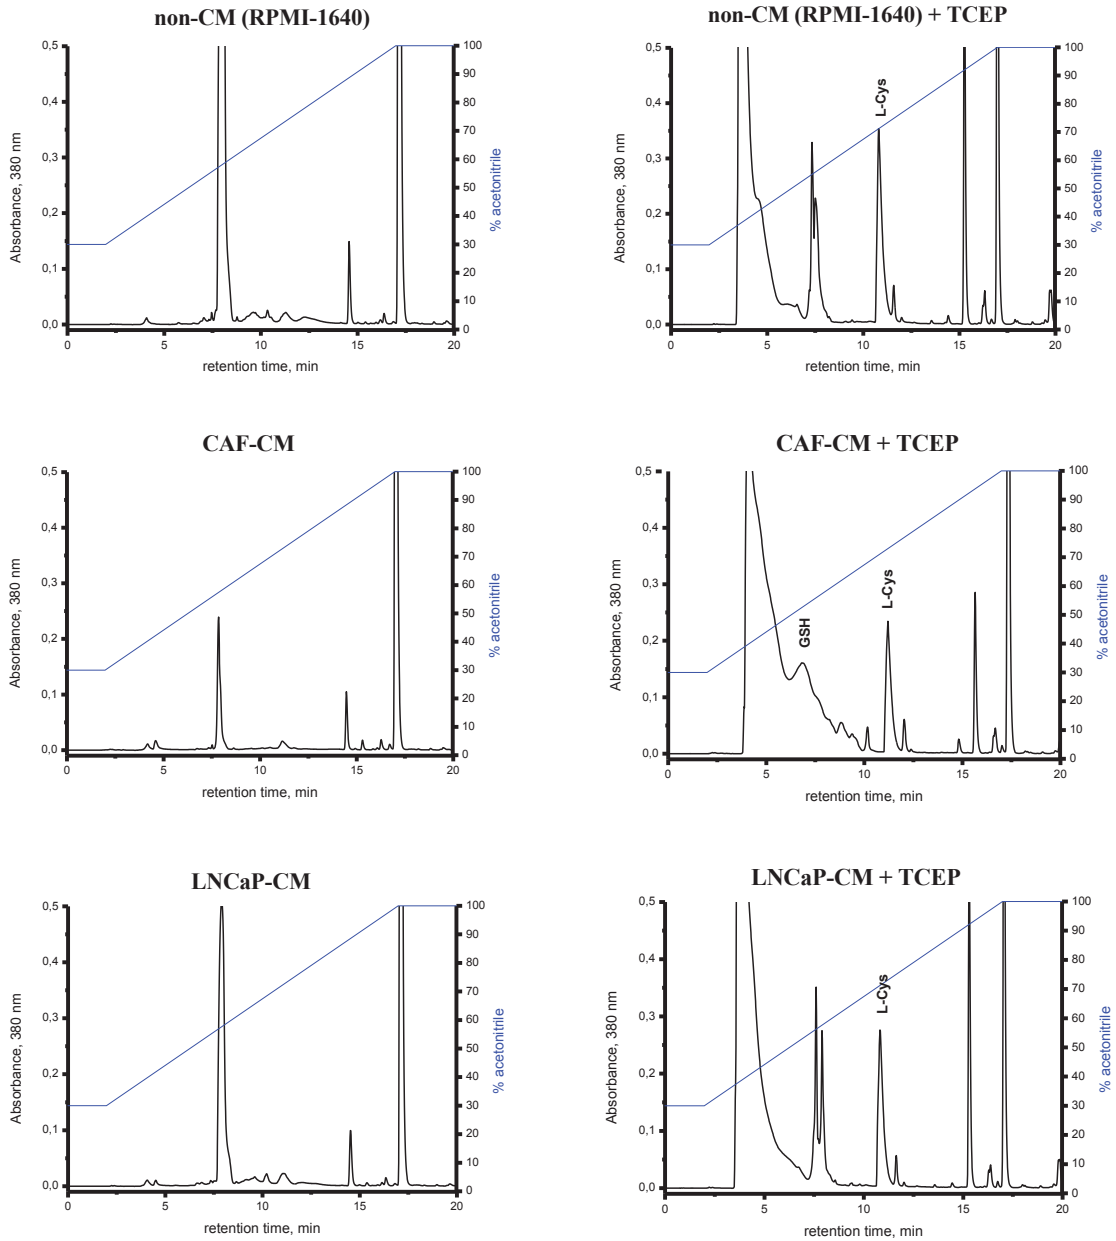

Figure S8

A

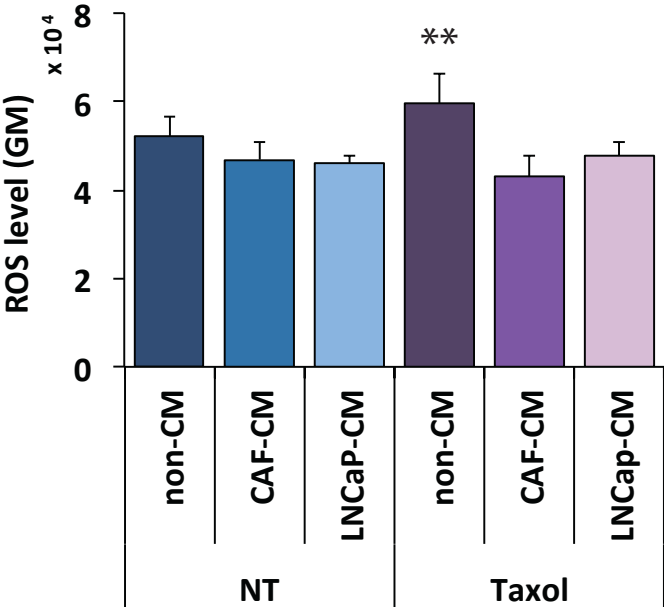

B

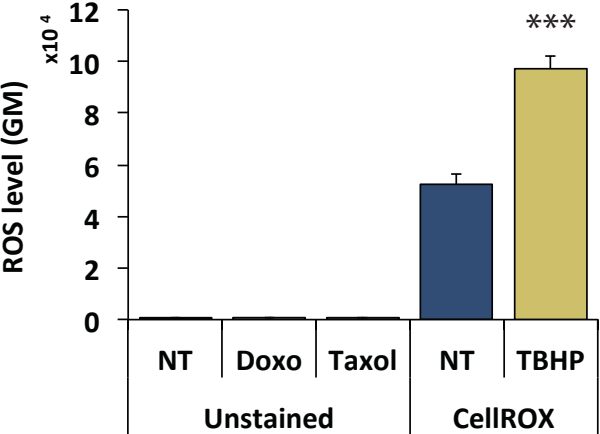

## Supplementary Table

Table S1

|          | Concentration (mM) | % reduction in doxo content |
|----------|--------------------|-----------------------------|
| -        | 0                  | 0                           |
| GSH      | 0.1                | -0.2                        |
|          | 1                  | 3.4                         |
|          | 5                  | 7.9                         |
| NAC      | 0.5                | 3.5                         |
|          | 5                  | 21.5                        |
| Cysteine | 0.05               | 0.7                         |
|          | 0.2                | 4.4                         |
|          | 1                  | 5.6                         |
| Cystine  | 0.05               | 1.8                         |
|          | 0.2                | 5.5                         |
|          | 1                  | 35.6                        |
